# Supplementary material for: Biopreservation of ready-to-eat Atlantic salmon (Salmo salar) by lactic acid bacteria: Effect on safety and quality parameters
Source: Research Square preprint supplement (doi:10.21203/rs.3.rs-7968166/v1), 2025-12-09
Supplement: Supplementary file 1 [file a26b9eb5b96e1e289c316304.docx]

**Additional file 1**

Table A1. Content of biogenic amines in vacuum-packed salmon portions stored at 4℃. Control and LAB-inoculated samples (*C. maltaromaticum* 35 (C.m.35), *C. maltaromaticum* 55 (C.m.55), *L. gelidum* 406 (Le.g.406), and *C. divergens* 468 (C.d.468)), evaluated on days 8 and 22. The results are presented as mean ± SD (n=3). Small letters indicate significant differences between the samples (LAB-inoculated and controls), with the corresponding p-value at the bottom of each column, calculated by one-way ANOVA (p<0.05).

|  | | Cadaverine (μg/g) | | | Spermidine (μg/g) | | | Tryptamine (μg/g) | | | Spermine (μg/g) | | | Tyramine (μg/g) | | |
| --- | --- | --- | --- | --- | --- | --- | --- | --- | --- | --- | --- | --- | --- | --- | --- | --- |
| Group | Day 8 | | Day 22 | Day 8 | | Day 22 | Day 8 | | Day 22 | Day 8 | | Day 22 | Day 8 | | Day 22 |
| C.m.35 | 0.4 ±0.4 | | 1.2±0.1b | ND | | ND | ND | | ND | ND | | ND | ND | | ND |
| C.m.55 | 0.7±0.4 | | 0.2±0.3a | 0.2±0.3 | | ND | 0.4±0.4 | | ND | ND | | ND | ND | | ND |
| Le.g.406 | 0.1±0.2 | | 1.2±0.1b | ND | | ND | ND | | ND | ND | | ND | ND | | ND |
| C.d.468 | 0.4±0.5 | | 0.6±0.3ab | ND | | ND | ND | | ND | ND | | ND | ND | | ND |
| Control | 0.3±0.5 | | 0.7±0.6ab | ND | | ND | ND | | ND | ND | | ND | ND | | ND |
| p-value | p=0.593 | | p=0.037 |  | |  |  | |  |  | |  |  | |  |

ND: Not detected

Table S2. Changes in breaking force and firmness (force at 60% compression) during the storage period in control and LAB-inoculated samples (*C. maltaromaticum* 35 (C.m.35), *C. maltaromaticum* 55 (C.m.55), *L. gelidum* 406 (Le.g.406), and *C. divergens* 468 (C.d.468)). Results are expressed in mean values (N) ± SD (n=3 for LAB-inoculated and n=6 for control samples). P-value on the bottom of each column represents significant differences between sample groups on the same day, calculated by one-way ANOVA (p<0.05).

|  | Breaking force (N) | | Firmness (N) | |
| --- | --- | --- | --- | --- |
| Group | Day 8 | Day 22 | Day 8 | Day 22 |
| C.m.35 | 18.6±3.1 | 12.2±4.2 | 18.7±6.1 | 12.5±5.2 |
| C.m.55 | 17.9±10.1 | 21.1±1.2 | 17.2±9.3 | 17.8±2.7 |
| Le.g.406 | 18.1±15.1 | 18.3±10.1 | 19.9±10.0 | 17.8±11.8 |
| C.d.468 | 17.4±1.5 | 12.6±2.2 | 16.5±1.5 | 12.4±3.5 |
| Control | 16.9±5.6 | 14.8±11.2 | 16.3±5.3 | 15.1±10.8 |
| p-value | p=0.998 | p=0.635 | p=0.942 | p=0.875 |
